# Supplementary material for: Deglacial export of pre-aged terrigenous carbon to the Bay of Biscay
Source: Copernicus journal article supplement (doi:10.5194/cp-20-121-2024), 2024-01-16
Supplement: Supplementary file 1 [file cp-20-121-2024-supplement.pdf]

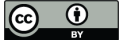

*Supplement of*

## **Deglacial export of pre-aged terrigenous carbon to the Bay of Biscay**

**Eduardo Queiroz Alves et al.**

*Correspondence to:* Eduardo Queiroz Alves ([eduardoa@id.uff.br](mailto:eduardoa@id.uff.br))

The copyright of individual parts of the supplement might differ from the article licence.

## 1 Considerations on the $f_{\beta\beta}$ proxy

In this study we have followed Meyer et al. (2019) and Wu et al. (2022) and applied the  $f_{\beta\beta}$  indicator to track possible petrogenic contributions to the OM in core GeoB23302-2 (see Equation 3 in the manuscript). The index is based on the relative abundance of the so-called biologic (i.e.,  $17\beta,21\beta(\text{H})$  and  $22\text{R}$ ) and geologic isomers (i.e.,  $17\beta,21\alpha\text{S}$ ,  $17\beta,21\alpha\text{R}$ ,  $17\alpha,21\beta\text{S}$  and  $17\alpha,21\beta\text{R}$ ) (e.g., Einsminger et al., 1972; Rohmer et al., 1992). The latter are usually the result of diagenetic and temperature-induced processes affecting the former and leading to a more thermally stable configuration (e.g., Seifert and Moldowan, 1980; Mackenzie and Mackenzie, 1983; Rohmer et al., 1992; Sinninghe Damsté et al., 1995; Van Duin et al., 1997; Kolaczowska et al., 1990; Peters and Moldowan, 1993; Lockhart et al., 2008). The hopane abundance in core GeoB23302-2 shows that the concentration of the biosynthesized  $31\beta\beta$  isomer, typically present in immature fresh OM, is positively correlated with that of  $31\alpha\beta\text{R}$ , which is commonly found in petrogenic sources (e.g., Peters and Moldowan, 1993; Sinninghe Damsté et al., 1995; Lockhart et al., 2008). This means that increases in the input of the  $31\alpha\beta\text{R}$  compound rather than transformations from  $\beta\beta$  to  $\alpha\beta$  and  $\beta\alpha$  isomers are responsible for decreases in the  $f_{\beta\beta}$  record. The geochemical signature of peat shows a high abundance of the  $31\alpha\beta\text{R}$  compound but comparatively low values for the  $31\alpha\beta\text{S}$  epimer (Inglis et al., 2018), which is reflected in our data. Contrary to what has been observed in Meyer et al. (2019), where low  $f_{\beta\beta}$  and relatively high  $S/(S+R)$  values indicate petrogenic input, we see low  $f_{\beta\beta}$  and low  $S/(S+R)$  values (Figure 1). Therefore, in this study, the  $f_{\beta\beta}$  proxy does not reflect petrogenic input but rather the influx of peat material.

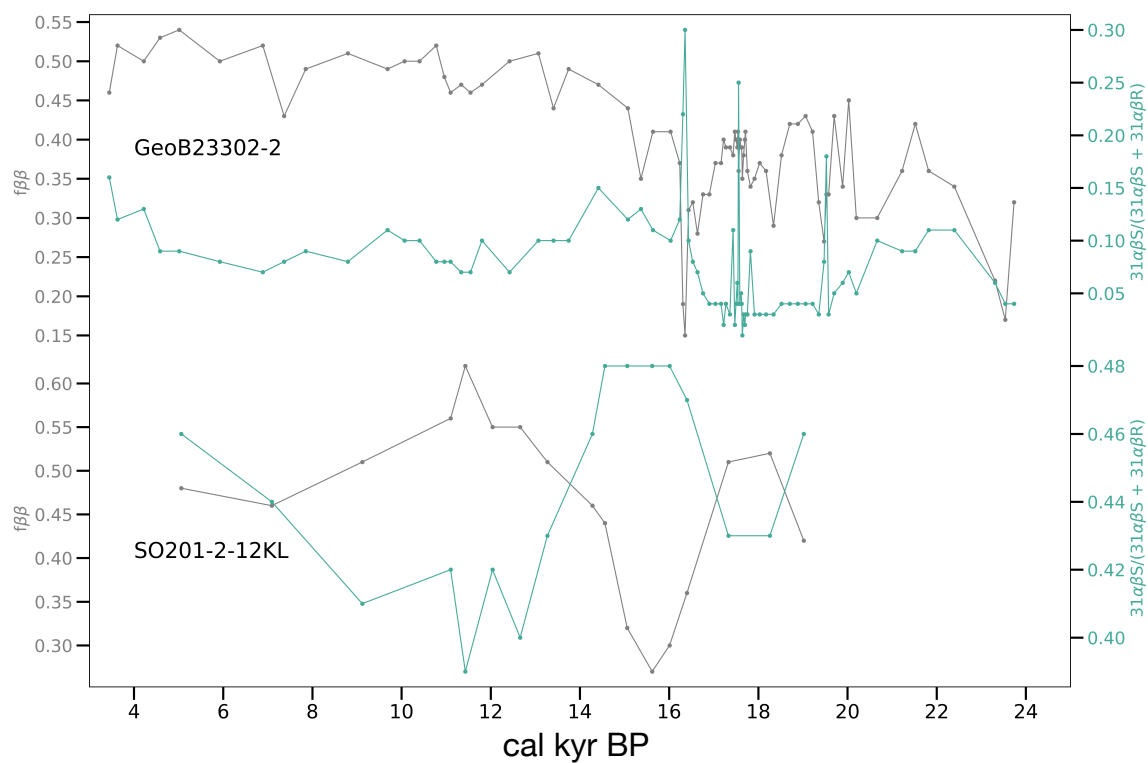

**Figure S 1.** Records of the  $f\beta\beta$  indicator and the relative abundance of the  $31\alpha\beta S$  and R compounds of cores GeoB23302-2 (this study) and SO201-2-12KL (Meyer et al., 2019) for comparison.

## 2 OxCal code of the age-depth model of core GeoB23302-2

```
Plot()
{
Curve("marine20","marine20.14c");
Delta_R("LocalMarineD",-94,45);
Outlier_Model("General",T(5),U(0,4),"t");
P_Sequence("P",1,0.1,U(-2,2))
{
Boundary();
R_Date("G",20432,202)
{
Outlier(0.05);
```

```
z=686.5;
};
R_Date("F",16893,203)
{
Outlier(0.05);
z=584.5;
};
{
};
R_Date("E",15112,151)
{
Outlier(0.05);
z=450.5;
};
R_Date("D",15131,142)
{
Outlier(0.05);
z=340.5;
};
{
};
R_Date("C",14111,124)
{
Outlier(0.05);
z=234.5;
};
R_Date("B",9981,105)
{
Outlier(0.05);
z=118.5;
};
```

```
R_Date("A",3556,67)
{
  Outlier(0.05);
  z=3.5;
};
Boundary();
};
};
```

### 3 Supplementary Figures

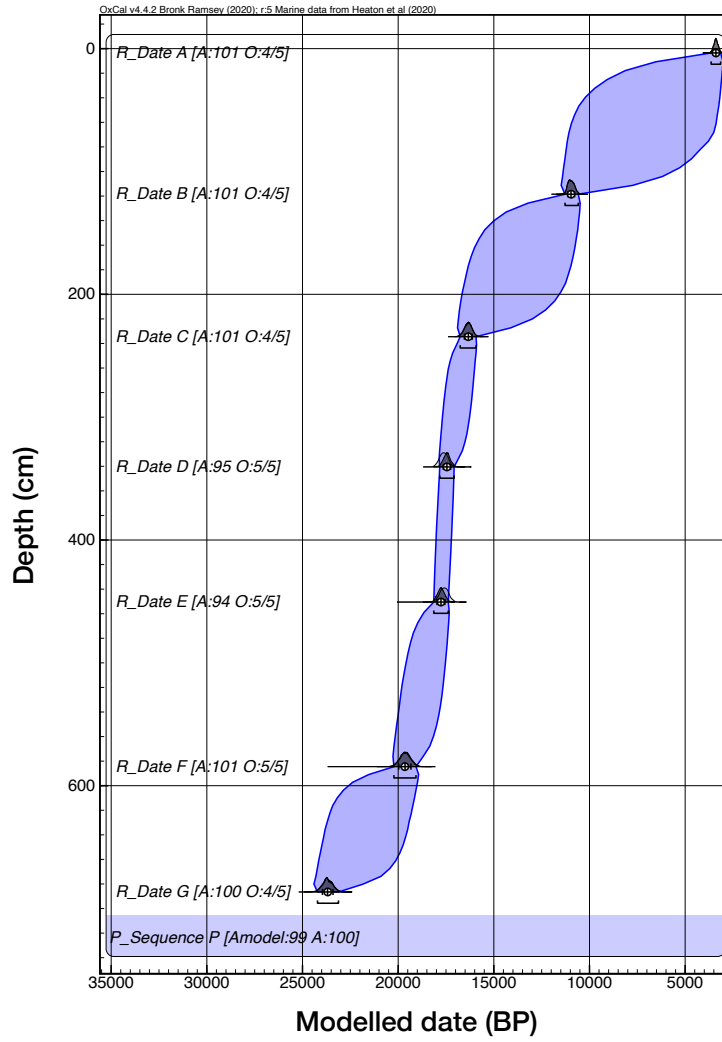

Figure S 2. Age-depth model for core GeoB23302-2.

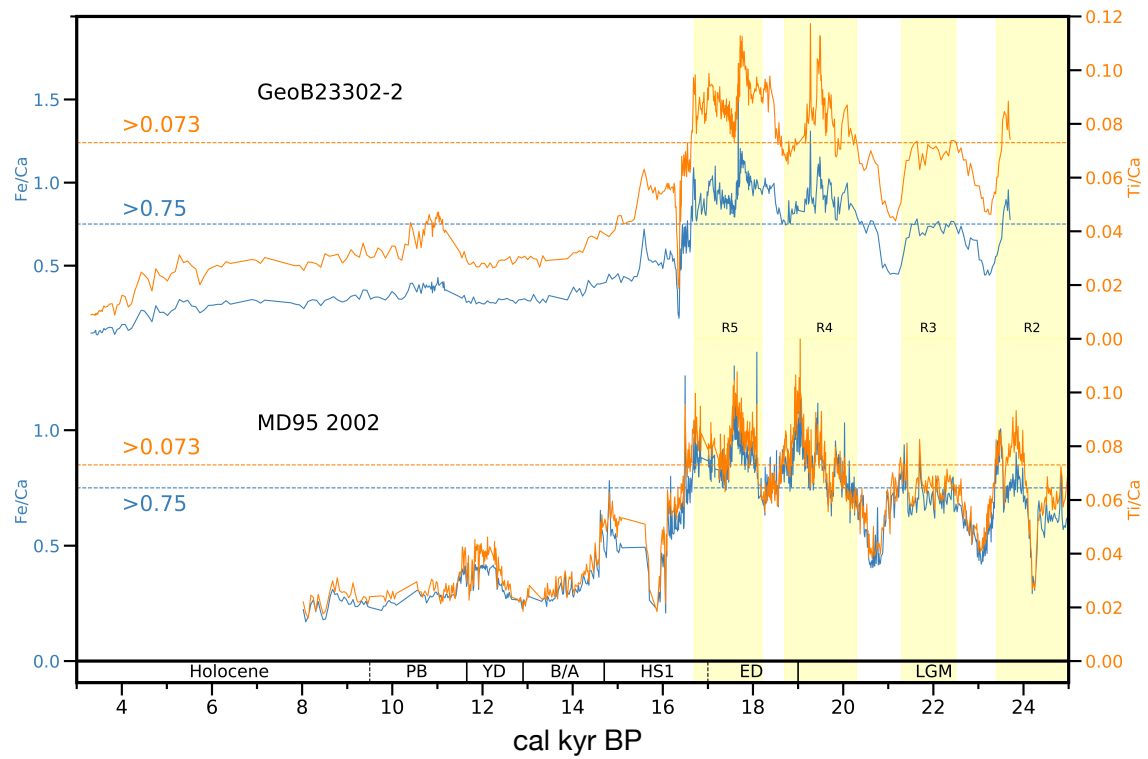

**Figure S 3.** XRF-Fe<sub>x</sub>/Ca and Ti/Ca data for cores GeoB23302-2 (this study) and MD95 2002 (Toucanne et al., 2015) allow for the identification of runoff events (R2-R5) that may have enhanced erosive processes and contributed <sup>14</sup>C-depleted OM to the continental slope.

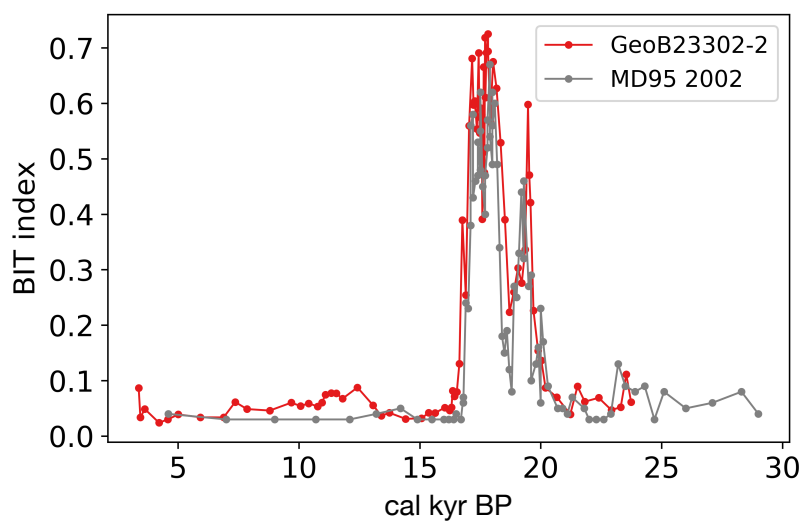

**Figure S 4.** BIT index data for cores GeoB23302-2 (this study) and MD95 2002 (Ménot et al., 2006).

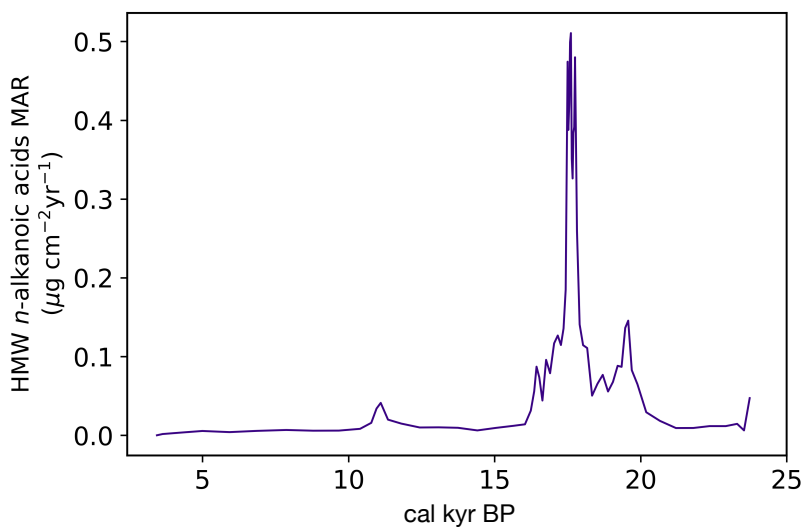

**Figure S 5.** Mass accumulation rate (MAR) of high molecular weight (HMW) *n*-alkanoic acids in core GeoB23302-2.



## References

- Einsminger, A., Albrecht, P., and Ourisson, G. (1972). Homohopane in Messel Oil Shale: First Identification of a C31 Pentacyclic Triterpane in Nature. *Tetrahedron Letters*, (36):3861–3864.
- Inglis, G. N., Naafs, B. D. A., Zheng, Y., McClymont, E. L., Evershed, R. P., and Pancost, R. D. (2018). Distributions of geohopanoids in peat: Implications for the use of hopanoid-based proxies in natural archives. *Geochimica et Cosmochimica Acta*, 224:249–261.
- Kolaczowska, E., Slougui, N. E., Watt, D. S., Maruca, R. E., and Michael Moldowan, J. (1990). Thermodynamic stability of various alkylated, dealkylated and rearranged 17 $\alpha$ - and 17 $\beta$ -hopane isomers using molecular mechanics calculations. *Organic Geochemistry*, 16(4-6):1033–1038.
- Lockhart, R. S., Meredith, W., Love, G. D., and Snape, C. E. (2008). Release of bound aliphatic biomarkers via hydropyrolysis from Type II kerogen at high maturity. *Organic Geochemistry*, 39(8):1119–1124.
- Mackenzie, A. and Mackenzie, D. (1983). Isomerization and aromatization of hydrocarbons in sedimentary basins formed by extension. *Geological Magazine*, 120(5):417–470.
- Ménot, G., Bard, E., Rostek, F., Weijers, J. W. H., Hopmans, E. C., Schouten, S., and Damste, J. S. S. (2006). Early Reactivation of European Rivers During the Last Deglaciation. *Science*, 313(September):1623–1625.
- Meyer, V. D., Hefter, J., Köhler, P., Tiedemann, R., Gersonde, R., Wacker, L., and Mollenhauer, G. (2019). Permafrost-carbon mobilization in Beringia caused by deglacial meltwater runoff, sea-level rise and warming. *Environmental Research Letters*, 14(8).
- Peters, K. and Moldowan, J. (1993). *The Biomarker Guide*. Prentice Hall, Englewood cliffs, NJ.
- Rohmer, M., Bisseret, P., and Neunlist, S. (1992). The hopanoids, prokaryotic triterpenoids and precursors of ubiquitous molecular fossils. In *Biological Markers in Sediments and Petroleum*, pages 1–17. Prentice Hall, Englewood cliffs, NJ.
- Seifert, W. K. and Moldowan, J. M. (1980). The effect of thermal stress on source-rock quality as measured by hopane stereochemistry. *Physics and Chemistry of the Earth*, 12(C):229–237.
- Sinninghe Damsté, J. S., Van Duin, A. C., Hollander, D., Kohnen, M. E., and De Leeuw, J. W. (1995). Early diagenesis of bacteriohopanepolyol derivatives: Formation of fossil homohopanoids. *Geochimica et Cosmochimica Acta*, 59(24):5141–5157.
- Toucanne, S., Soulet, G., Freslon, N., Silva Jacinto, R., Dennielou, B., Zaragosi, S., Eynaud, F., Bourillet, J. F., and Bayon, G. (2015). Millennial-scale fluctuations of the European Ice Sheet at the end of the last glacial, and their potential impact on global climate. *Quaternary Science Reviews*, 123:113–133.
- Van Duin, A. C., Sinninghe Damsté, J. S., Koopmans, M. P., Van De Graaf, B., and De Leeuw, J. W. (1997). A kinetic calculation method of homohopane maturation: Applications in the reconstruction of burial histories of sedimentary basins. *Geochimica et Cosmochimica Acta*, 61(12):2409–2429.

Wu, J., Mollenhauer, G., Stein, R., Köhler, P., Hefter, J., Fahl, K., Grotheer, H., Wei, B., and Nam, S.-i. (2022). Deglacial release of petrogenic and permafrost carbon from the Canadian Arctic impacting the carbon cycle. *Nature Communications*, 13:1–11.
